# Supplementary material for: Association of hormone receptor status with cardiovascular disease mortality in 399,209 patients with stage I to III breast cancer: A population-based study
Source: PubMed Central journal article supplement — Medicine (Baltimore). 2022 Nov 18;101(46):e31911. doi: 10.1097/MD.0000000000031911 (PMC9678603; doi:10.1097/md.0000000000031911), 2022-11-18

**Figure S1** Cumulative incidence curves of all causes of death for select population groups: (A) <60 years, (B) follow-up time within 6 years, (C) stage II BC, and (D) stage III BC.

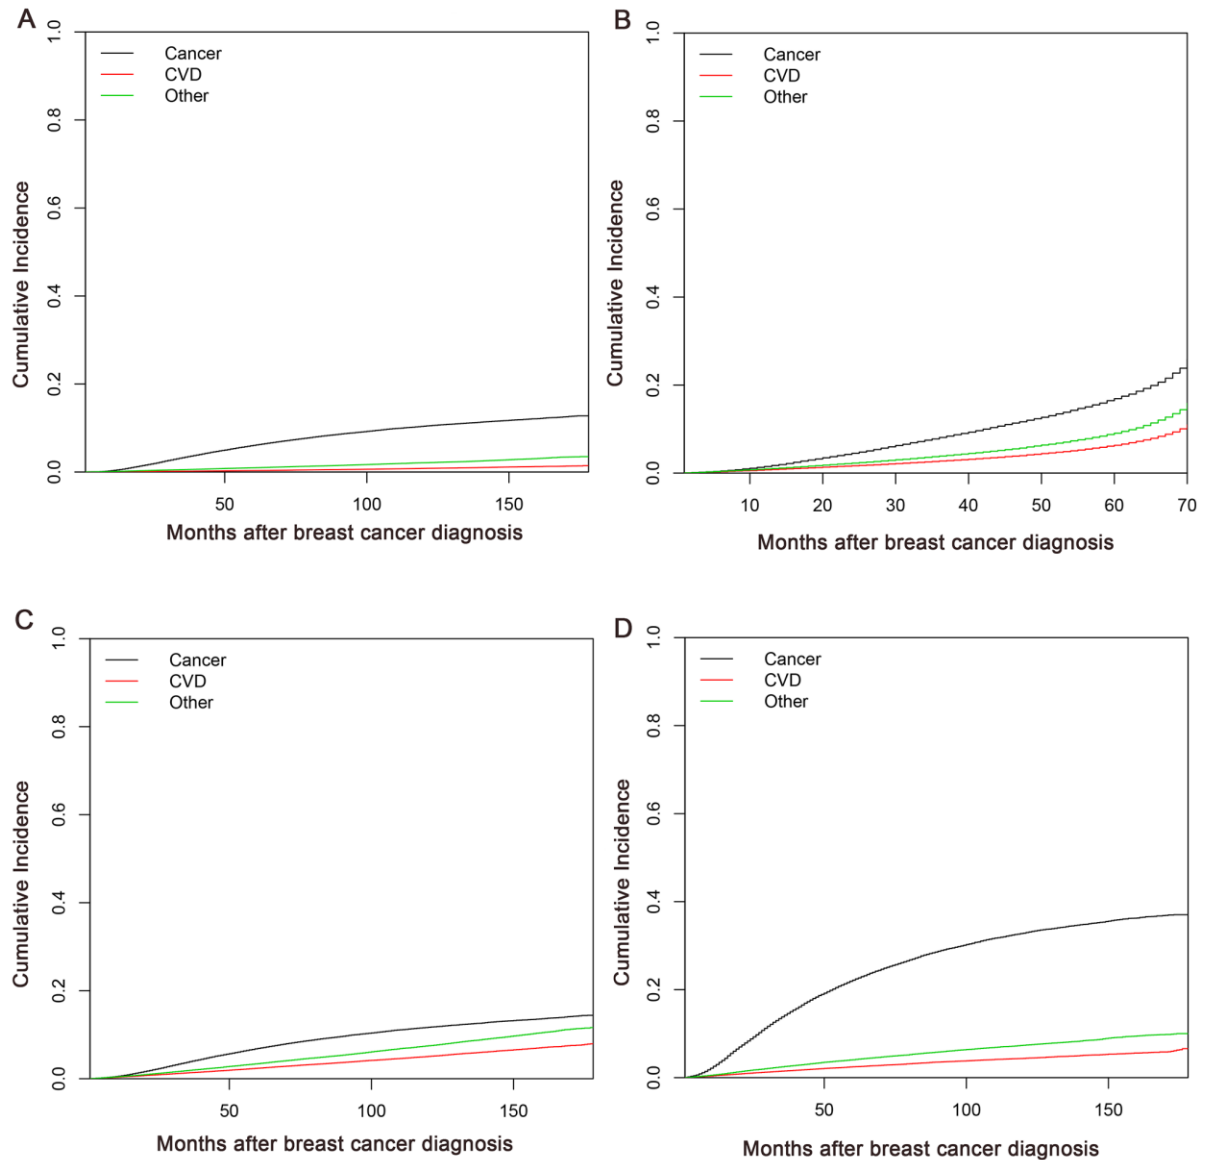

Supplement: medi-101-e31911-s001.pdf [file medi-101-e31911-s001.pdf]
